# Supplementary material for: Signal-enhanced electrochemical immunosensor for CD36 based on cascade catalysis of a GOx labeled Prussian blue functionalized Ceria nanohybrid
Source: Royal Society of Chemistry journal article supplement (doi:10.1039/c4ra10413g), 2014-11-10
Supplement: c4ra10413g1.pdf [file c4ra10413g1.pdf]

**Electronic Supplementary Information for**  
**Signal-enhanced electrochemical immunosensor for CD36**  
**based on cascade catalysis of GOx labeled Prussian blue**  
**functionalized Ceria nanohybrid**

**Kan-Fu Peng, Hong-Wen Zhao, Xiong-Fei Wu \***

*Department of Kidney, Southwest Hospital, Third Military Medical University, Chongqing, 400038, PR China*

*E-mail: wuxfei@126.com (X. Wu). Tel.: +86 23 68754188; fax: +86 23 68754188.*

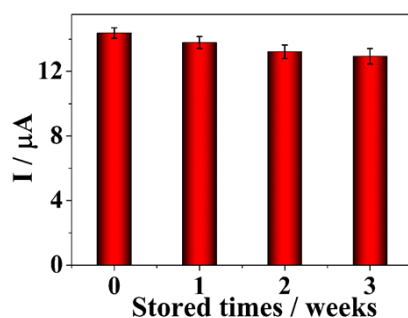

Fig.S1 Stabilities of immunosensors for 1 week, 2 weeks and 3 weeks, respectively (error bars: SD, n = 3).
